# Supplementary material
Source: PubMed Central journal article supplement (PMC9922408)
Supplement: kiac551_supplementary_data.pdf [file kiac551_supplementary_data.pdf]

**Ascorbate peroxidase 1 allows monitoring cytosolic accumulation of effector-triggered reactive oxygen species using a luminol-based assay**

**Supplemental figures and table**

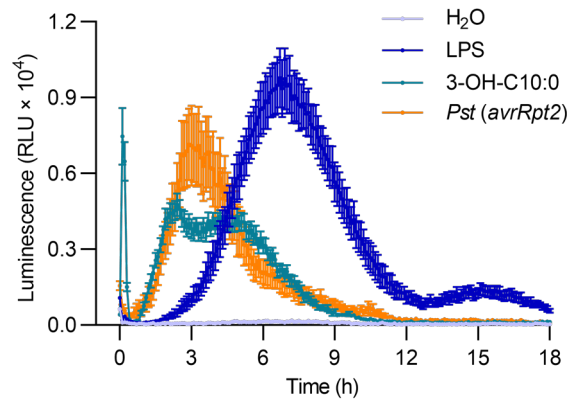

**Supplemental Figure S1. The kinetics of ROS burst triggered by LPS/3-OH-C10:0/*Pst (avrRpt2)*.**

The kinetics of LPS (50 µg/mL) or 3-OH-C10:0 (5 µM)-triggered long-lasting ROS burst is highly similar to that triggered by avirulent *Pseudomonas syringae* pv. *tomato* (*Pst*) DC3000 (*avrRpt2*) at OD<sub>600</sub> of 0.003. ROS signals were monitored for 18 h using a chemiluminescence assay with luminol as a substrate. Data are presented as the mean ± SE (n = 8). The experiment was repeated three times with similar trends.

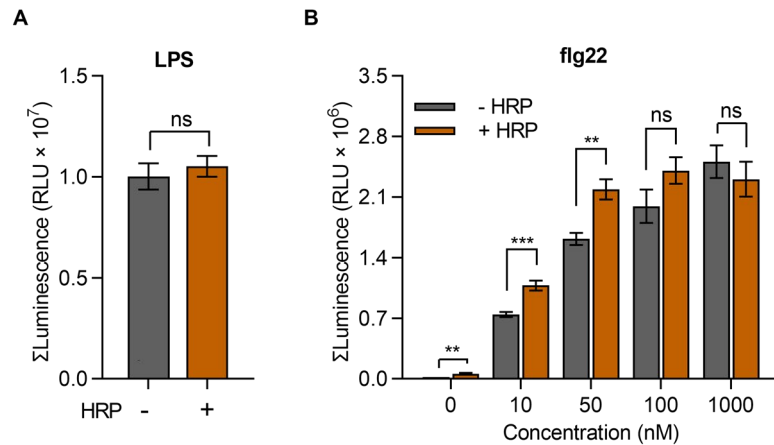

**Supplemental Figure S2. HRP is not indispensable when ROS level is high enough to oxidize luminol**

ROS were measured using a luminol-based chemiluminescent assay with or without HRP (20 mg/L). The bar graph indicates the total integrated photon counts within 21 h after LPS (50  $\mu$ g/mL) treatment (**A**) or 30 min after different concentrations of flg22 treatment (**B**). Data are presented as the mean  $\pm$  SE ( $n = 10$  in **A**,  $7$  in **B**). Student's  $t$  test;  $**P \leq 0.01$ ;  $***P \leq 0.001$ ; ns, no significant differences. The experiments were repeated at least three times with similar trends.

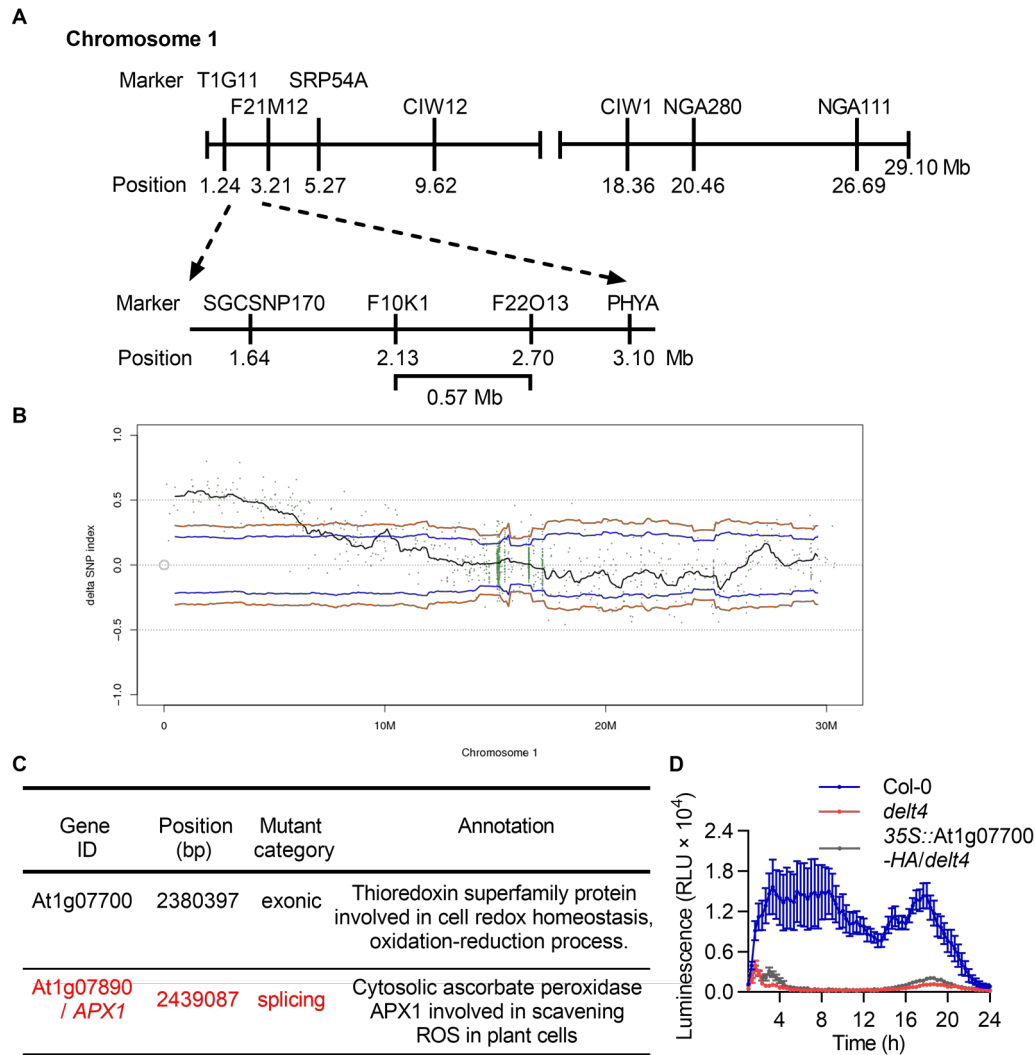

### Supplemental Figure S3. Molecular characterization of the *DELTA4* gene

- A.** The *DELTA4* mutation mapped to chromosome 1 (Chr1). The two molecular markers F10K1 and F22O13 were 0.57 Mb apart.
- B.**  $\Delta$ SNP-index plot of Chr1 generated by whole-genome sequencing. Green dots correspond to each  $\Delta$ SNP-index, and the black line represents the average values of the  $\Delta$ SNP-index at 1 Mb intervals with a 100-kb increment. The candidate region (0–5 Mb) is above the orange line indicating cutoff values.
- C.** Two nonsynonymous SNPs in the At1g07890 and At1g07700 genes were identified in the candidate regions as indicated by genetic mapping in **A**.
- D.** At1g07700 failed to rescue the luminescent signals of *delta4* mutants. Luminescent signals were measured using a luminol-based chemiluminescent assay after treatment with LPS (50  $\mu$ g/mL). Data are shown as the mean  $\pm$  SE (n = 8).

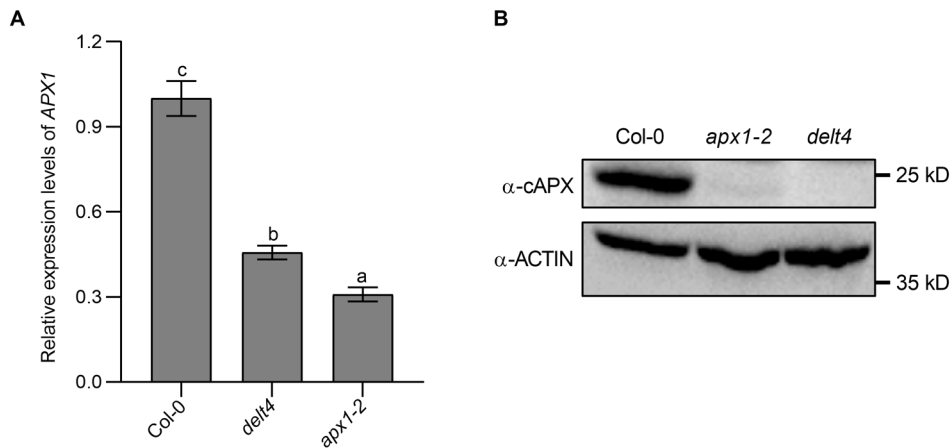

**Supplemental Figure S4. *APX1* transcripts and protein abundance in *apx1* mutants**

- A.** *APX1* transcript levels. Total RNA was prepared from 8-day-old seedlings. *APX1* expression in Col-0, *apx1-2*, and *delt4* mutants was quantified by RT-qPCR. Data are shown as the mean  $\pm$  SE (n = 4). Means with different letters denote significant differences ( $P \leq 0.05$ , one-way ANOVA).
- B.** *APX1* protein abundance. Proteins were extracted from 8-day-old seedlings and detected in Col-0, *apx1-2*, and *delt4* mutants by immunoblot analysis using an  $\alpha$ -cAPX antibody. Actin was used as the loading control. All experiments were repeated at least three times with similar results.

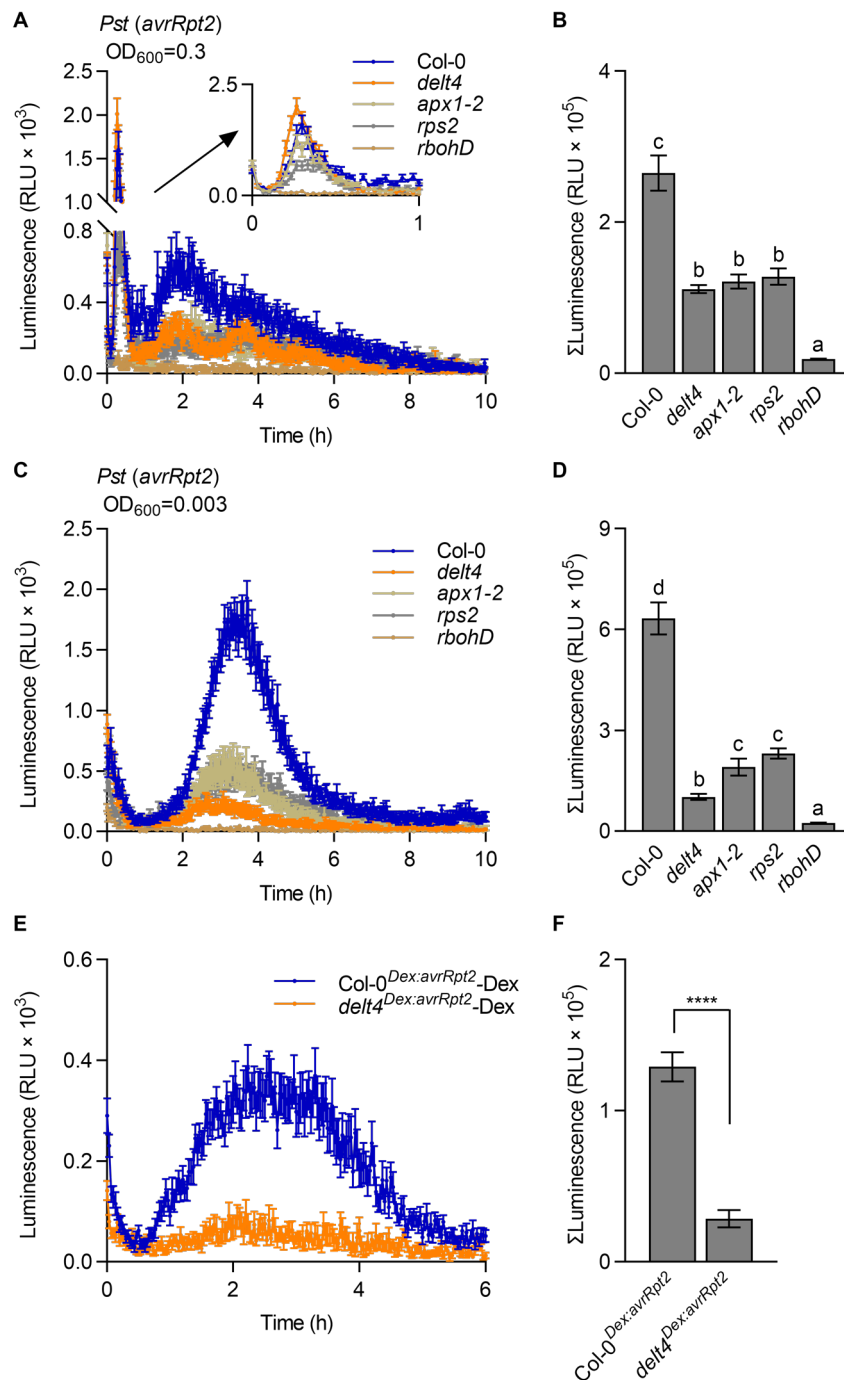

### Supplemental Figure S5. The *apx1* mutants show reduced effector-triggered long-lasting luminescent signals

**A.** The *delt4* and *apx1-2* mutants showed reduced long-lasting luminescent signals after treatment with *Pseudomonas syringae* pv. *tomato* (*Pst*) DC3000 (*avrRpt2*) at an OD<sub>600</sub> of 0.3. Luminescent signals were monitored for 10 h using a luminol-based chemiluminescent assay. The first peak within 1 h is magnified in the upper right corner of the figure. The *rps2* and *rbohD* mutants were used as negative controls. Data are shown as the mean ± SE (n = 9).

- B.** Total luminescent signals within 1–10 h from **A**. Data are shown as the mean  $\pm$  SE (n = 9). Different letters above the bars indicate significant differences between different genotypes ( $P \leq 0.05$ , one-way ANOVA).
- C.** The *delt4* and *apx1-2* mutants showed reduced long-lasting luminescent signals after treatment with *Pst* (*avrRpt2*) at an OD<sub>600</sub> of 0.003. Luminescent signals were monitored for 10 h using a luminol-based chemiluminescent assay. The *rps2* and *rbohD* mutants were used as negative controls. Data are shown as the mean  $\pm$  SE (n = 9).
- D.** Total luminescent signals within 1–10 h from **C**. Data are shown as the mean  $\pm$  SE (n = 9). Different letters above the bars indicate significant differences between different genotypes ( $P \leq 0.05$ , one-way ANOVA).
- E.** The dynamics of luminescent signals after treatment with 10  $\mu$ M dexamethasone (Dex). Luminescent signals were monitored using a luminol-based chemiluminescent assay in the leaf disks of Col-0<sup>Dex:avrRpt2</sup> and *delt4*<sup>Dex:avrRpt2</sup> transgenic plants. Data are shown as the mean  $\pm$  SE (n = 18).
- F.** Total luminescent signals within 0.5–6.0 h from **E**. Data are shown as the mean  $\pm$  SE (n = 18, \*\*\*\* $P \leq 0.0001$ , *t*-test). Experiments in this figure were repeated at least three times with similar trends.

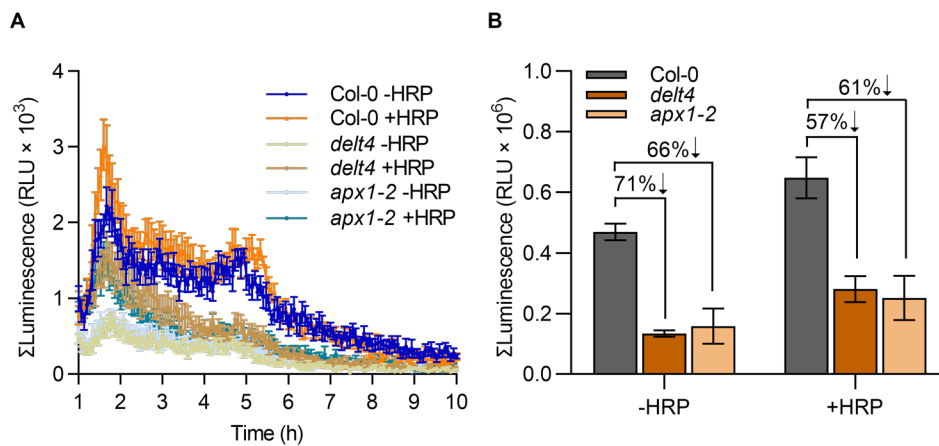

**Supplemental Figure S6. The exogenous addition of HRP cannot restore the reduced ETI-ROS signals in *apx1* mutants**

HRP (20 mg/L) was exogenously applied for the luminol-based chemiluminescent assay. ROS signals were recorded for 10 h after treatment with *Pst* (*avrRpt2*) ( $OD_{600} = 0.03$ ). Total photon counts (**B**) within 1-10 h were calculated from (**A**). Data are presented as the mean  $\pm$  SE ( $n = 7-8$  in **A**, **B**). Values above the bars indicate the different percentage between groups, and arrows indicate a decrease in mutants compared with the wild-type (Col-0). The experiment was repeated three times with similar trends.



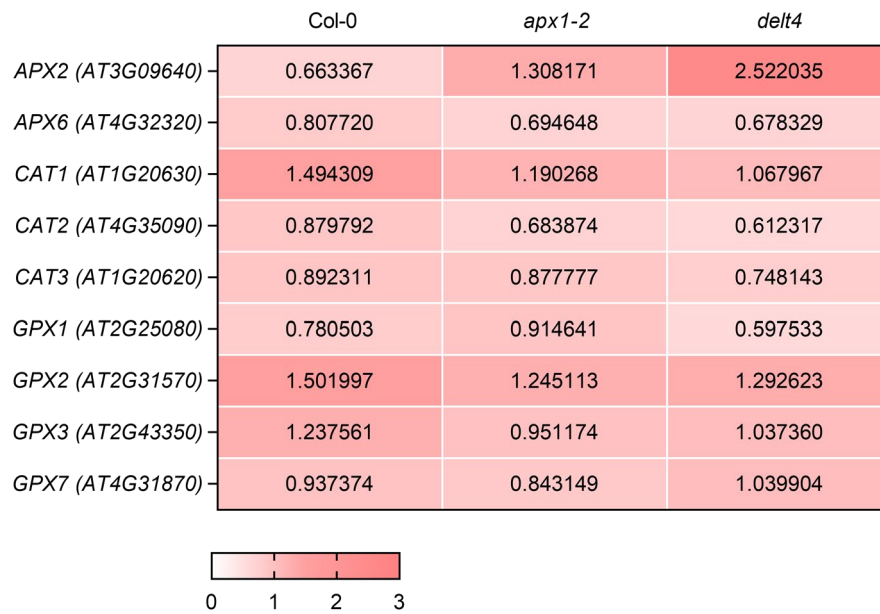

### Supplemental Figure S7. Expression of genes involved in ROS scavenging

Total RNA was extracted from wild type plants, *apx1-2* and *delt4* mutants 4 h after treatment with ddH<sub>2</sub>O or 50 µg/mL LPS. Relative gene expression was quantified by RT-qPCR. The heatmap shown is based on log<sub>2</sub>-transformed fold changes in gene expression (normalized against expression of the corresponding genes treated with mock control (ddH<sub>2</sub>O)). APX, ascorbate peroxidase; CAT, catalase; GPX, glutathione peroxidase.

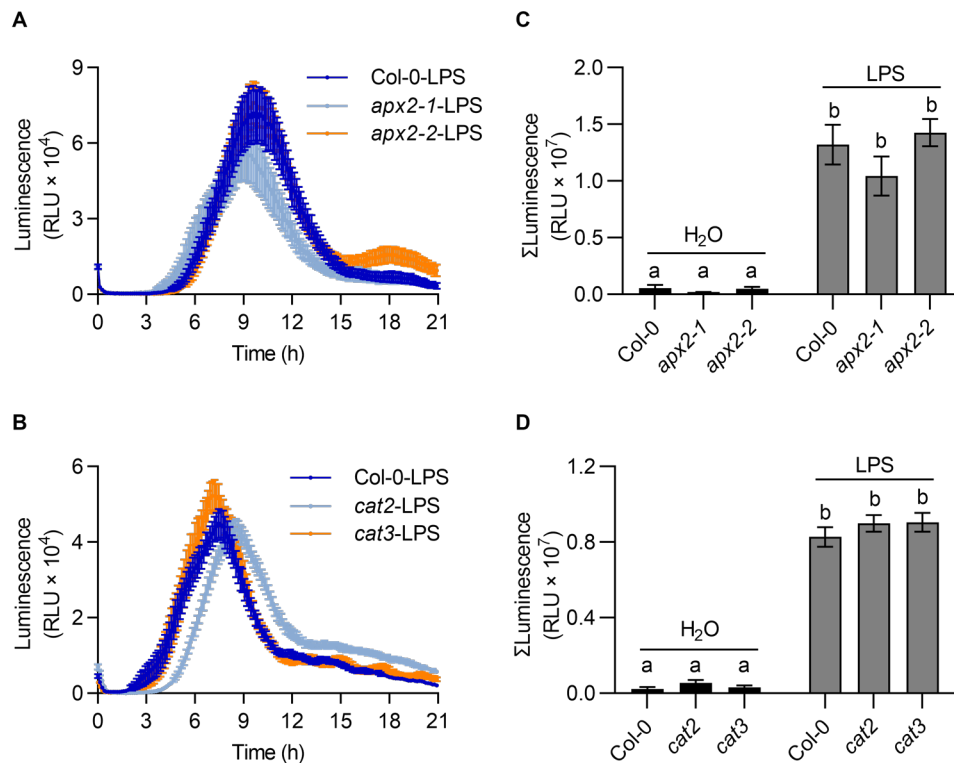

**Supplemental Figure S8. *apx2*, *cat2*, and *cat3* mutants are not impaired in LPS-triggered long-lasting ROS accumulation**

ROS signals were monitored using a luminol-based chemiluminescent assay. Signals were recorded for 21 h after treatment with 50  $\mu$ g/mL LPS. ROS kinetics (**A** and **B**) and total ROS levels within 1–21 h (**C** and **D**) were compared between wild-type and the indicated mutants. Data are shown as the mean  $\pm$  SE ( $n = 8$  in **A** and **C**; 12 in **B** and **D**). Means with different letters are significantly different ( $P \leq 0.05$ , one-way ANOVA), whereas those with the same letters are not. All experiments were repeated three times with similar results.

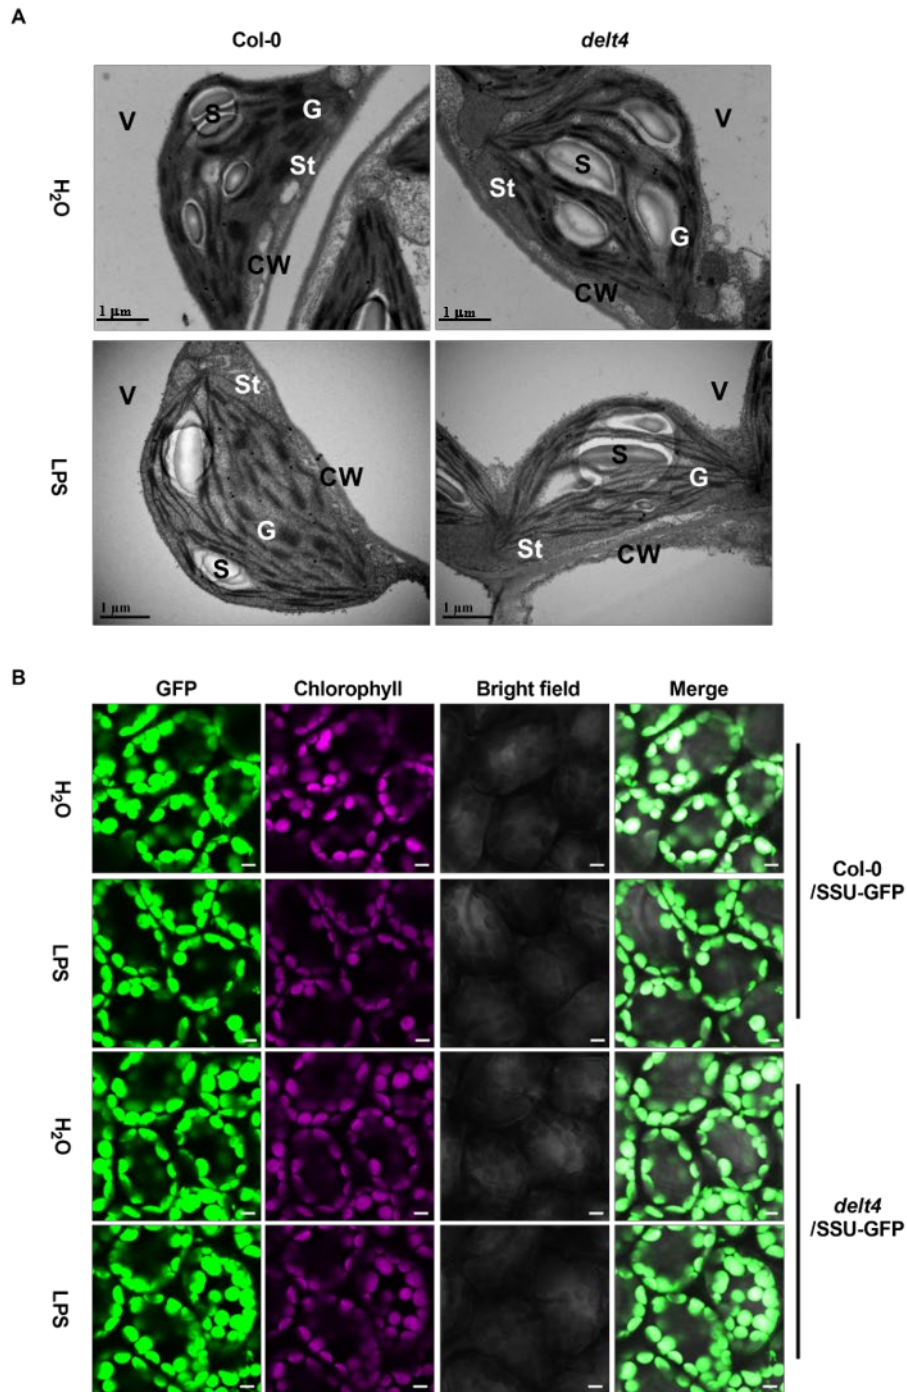

**Supplemental Figure S9. Chloroplasts of *delt4* mutants are not impaired after LPS treatment**

**A.** *delt4* mutants showed a chloroplast structure similar to that of the wild-type. Four-week-old leaves of Col-0 and *delt4* mutants were harvested 4 h after infiltration with LPS (100  $\mu$ g/mL) or ddH<sub>2</sub>O, and fixed and sectioned for observation by transmission electron microscopy. Two leaves were prepared for each treatment, with three sections for each leaf. Representative images of the ultrastructure of chloroplasts are shown. G, granum; St, chloroplast stroma; S, starch; V, vacuoles; CW cell wall. Scale bars, 1  $\mu$ m.

**B.** *delt4* mutants did not exhibit the release of the small subunit of ribulose-1.5-bisphosphate carboxylase (SSU) proteins from the chloroplasts before and after treated with LPS (100  $\mu\text{g}/\text{mL}$ ) or ddH<sub>2</sub>O for 4 h. Confocal microscopy shows signals from green fluorescent protein (GFP)-tagged SSU (SSU-GFP) proteins and chlorophyll (Chl) autofluorescence. Scale bars, 5  $\mu\text{m}$ .

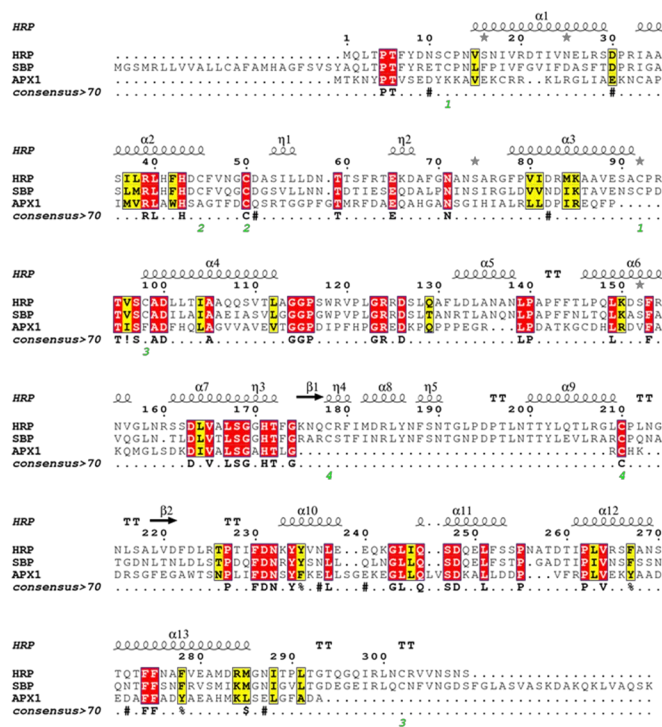

### Supplemental Figure S10. Sequence alignment of APX1 with horseradish peroxidase (HRP) and soybean peroxidase (SBP)

Sequence alignment was performed using the web server, ESPrIPT 3.0 (<http://espript.ibcp.fr>). Residues conserved between groups are indicated by bold white letters in red boxes (e.g., R38). Residues conserved within a group while significantly different between groups are indicated by bold black letters on a yellow background (e.g., W41). The symbols above the blocks of sequences correspond to the secondary structure of the HRP protein.

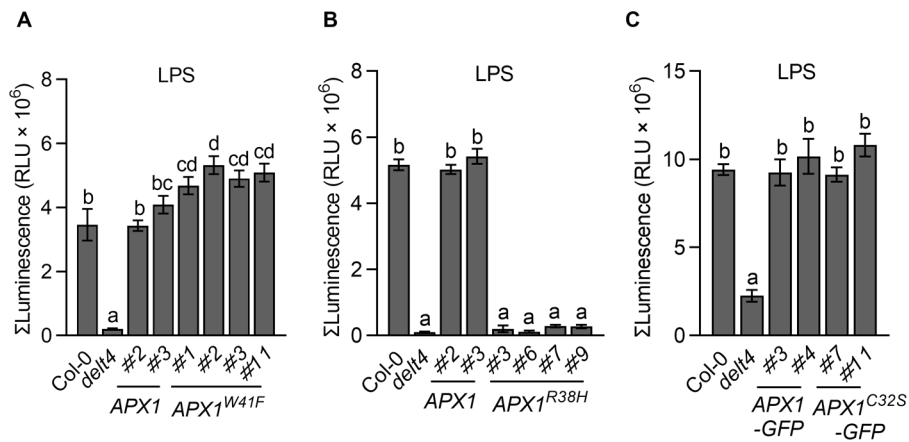

**Supplemental Figure S11. Effect of *APX1* mutation on luminol-based light signals triggered by LPS**

- A.** Transformation of *APX1*<sup>W41F</sup> complemented the luminol-emitted long-lasting light signals of *delt4* mutants in response to LPS. The bar graph indicates the total integrated photon counts within 1-21 h using a luminol-based chemiluminescent assay after LPS (50 μg/mL) treatment.
- B.** Transformation *APX1*<sup>R38H</sup> failed to complement the luminol-emitted long-lasting light signals of *delt4* mutants in response to LPS. The experimental conditions were similar to those used in **A**.
- C.** Transformation of *APX1*<sup>C32S</sup> complemented the luminol-emitted long-lasting light signals of *delt4* mutants in response to LPS. The experimental conditions were similar to those used in **A**.

Data are shown as the mean ± SE (n = 8 in A, B, C). Different letters above the bars indicate significant differences between different genotypes ( $P \leq 0.05$ , one-way ANOVA). All experiments in this figure were repeated three times with similar trends.



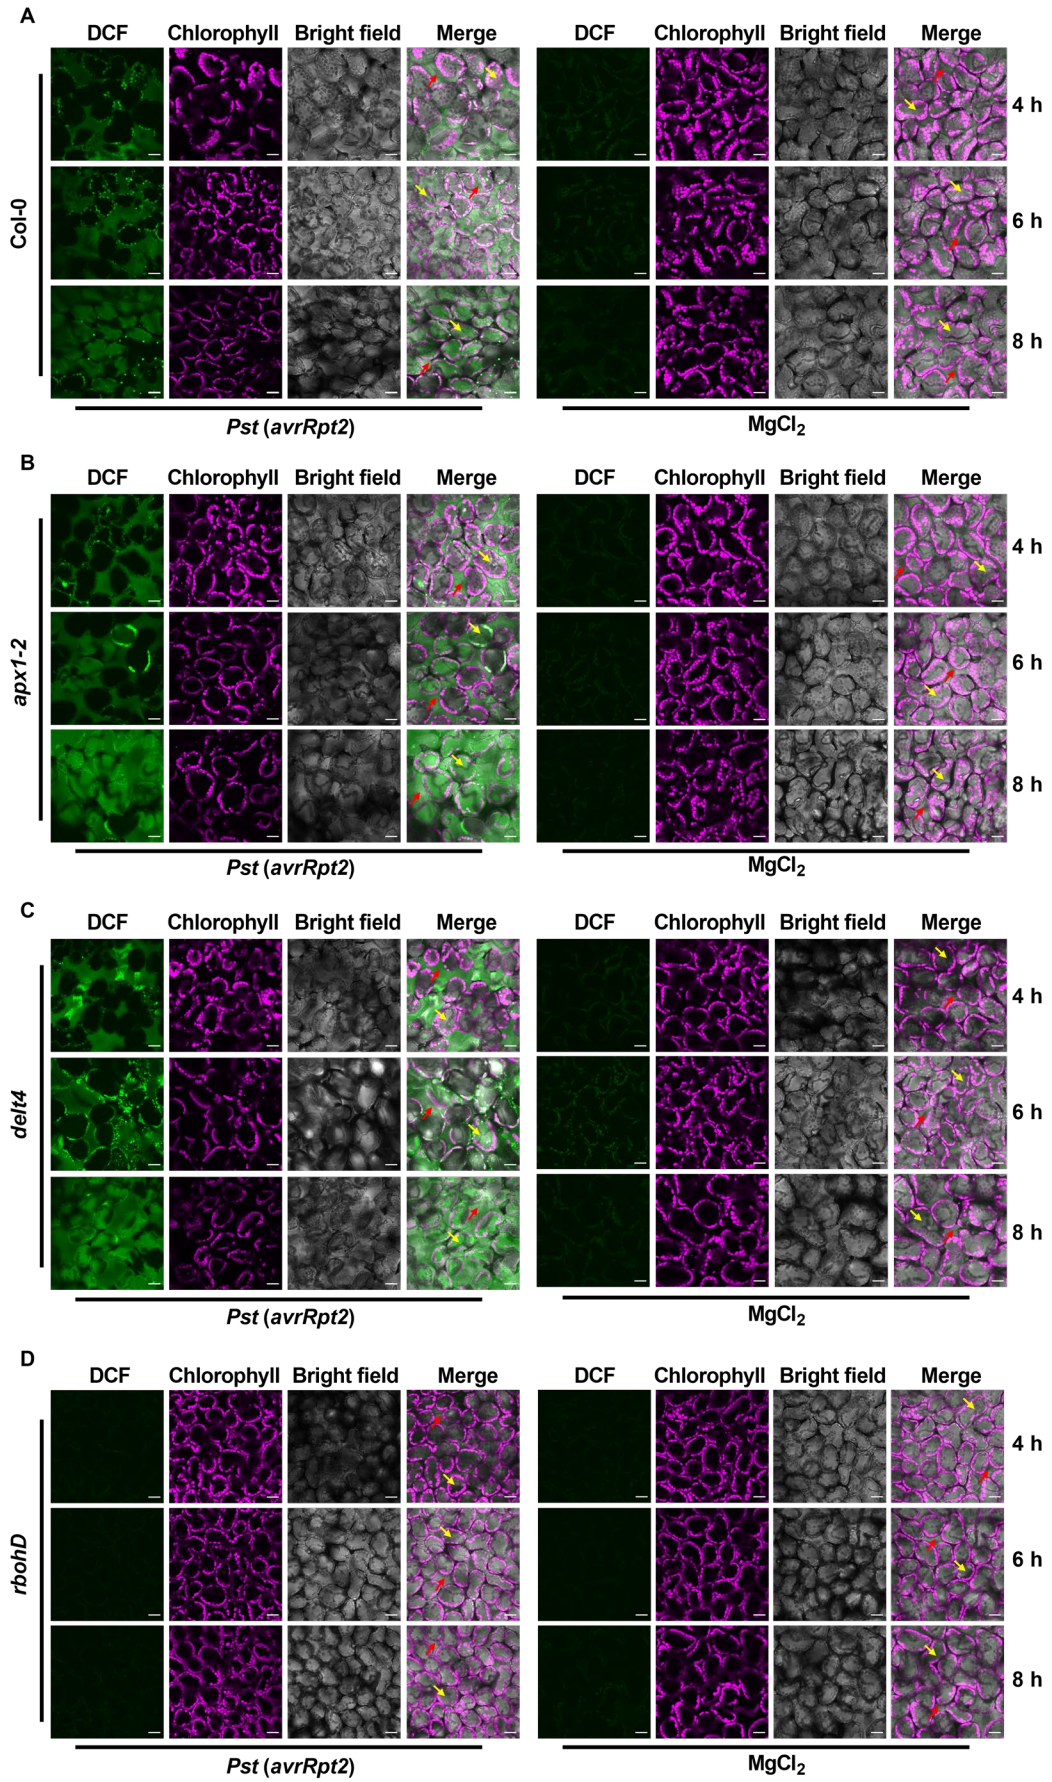

**Supplemental Figure S12. The temporal and spatial ETI-ROS detected by H<sub>2</sub>DCFDA staining**

ROS burst was detected in four-week-old Col-0 (A), *apx1-2* (B), *delt4* (C) and *rbohD* (D) plants at 4, 6, 8 h after bacterial infiltration. The abaxial side of leaves of the indicated plants were infiltrated with *Pst* (*avrRpt2*) at an OD<sub>600</sub> of 0.03, with MgCl<sub>2</sub> as the control. Before ROS observation, the H<sub>2</sub>DCFDA solution (10 μM) was infiltrated into leaves for 10-15 min. ROS fluorescence (green) and chlorophyll autofluorescence (magenta) were analyzed under a confocal microscope. At least six leaves were observed for each treatment, and representative images were shown. Red arrowheads indicate the apoplast space, while yellow arrowheads indicate the cytoplasm. Scale bars, 20 μm. The experiment was repeated three times with similar results.



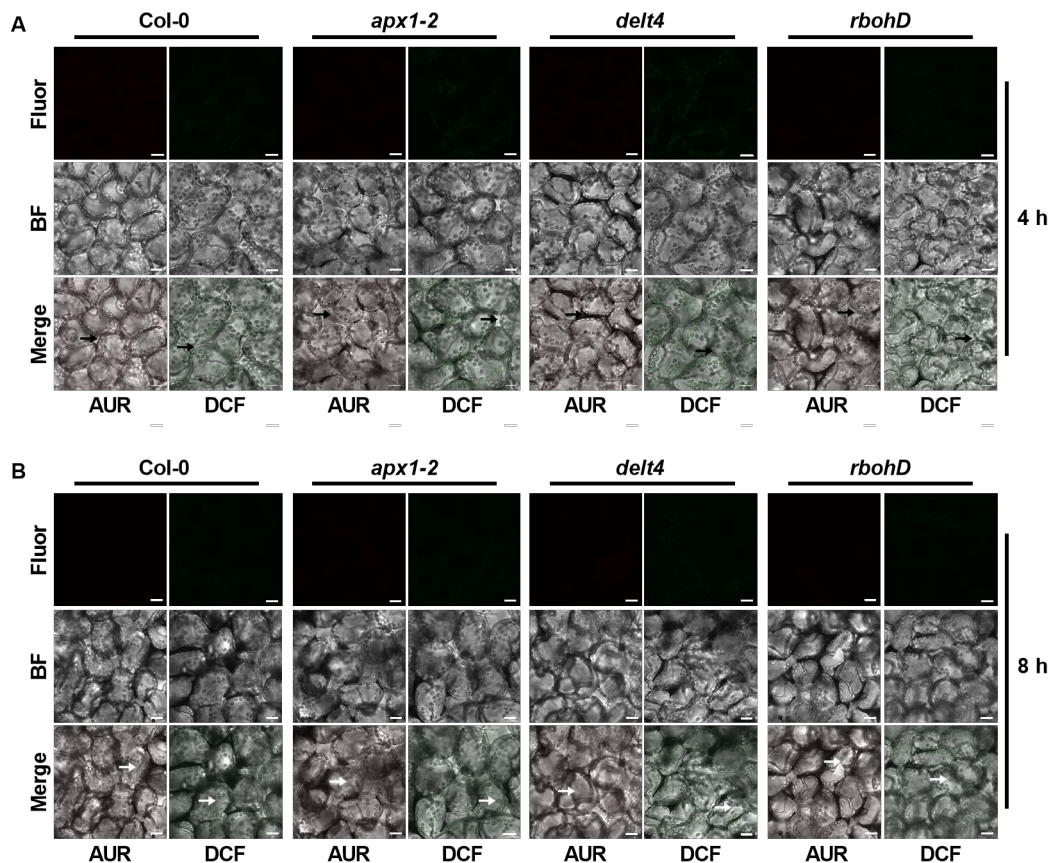

**Supplemental Figure S13. Detection of ROS accumulation in leaves infiltrated with  $MgCl_2$  by AUR and  $H_2DCFDA$  staining.**

The abaxial side of four-week-old leaves from Col-0, *apx1-2*, *delt4* and *rbohD* plants were infiltrated with  $MgCl_2$ , which was used as the control for *Pst (avrRpt2)* in Figure 7, and the experimental conditions were same as those used in Figure 7. Fluorescence was observed at 4 (A) and 8 h (B) after infiltration. Before microscopic observation, leaves were infiltrated with a solution of AUR or  $H_2DCFDA$  and incubated for 15-30 min. At least six leaves were observed for each treatment, and representative images were shown. Black arrowheads indicate the apoplast space, while white arrowheads indicate the cytoplasm. Scale bars, 15  $\mu m$ . Fluor, Fluorescence; BF, Bright Field. The experiment was repeated three times with similar results.

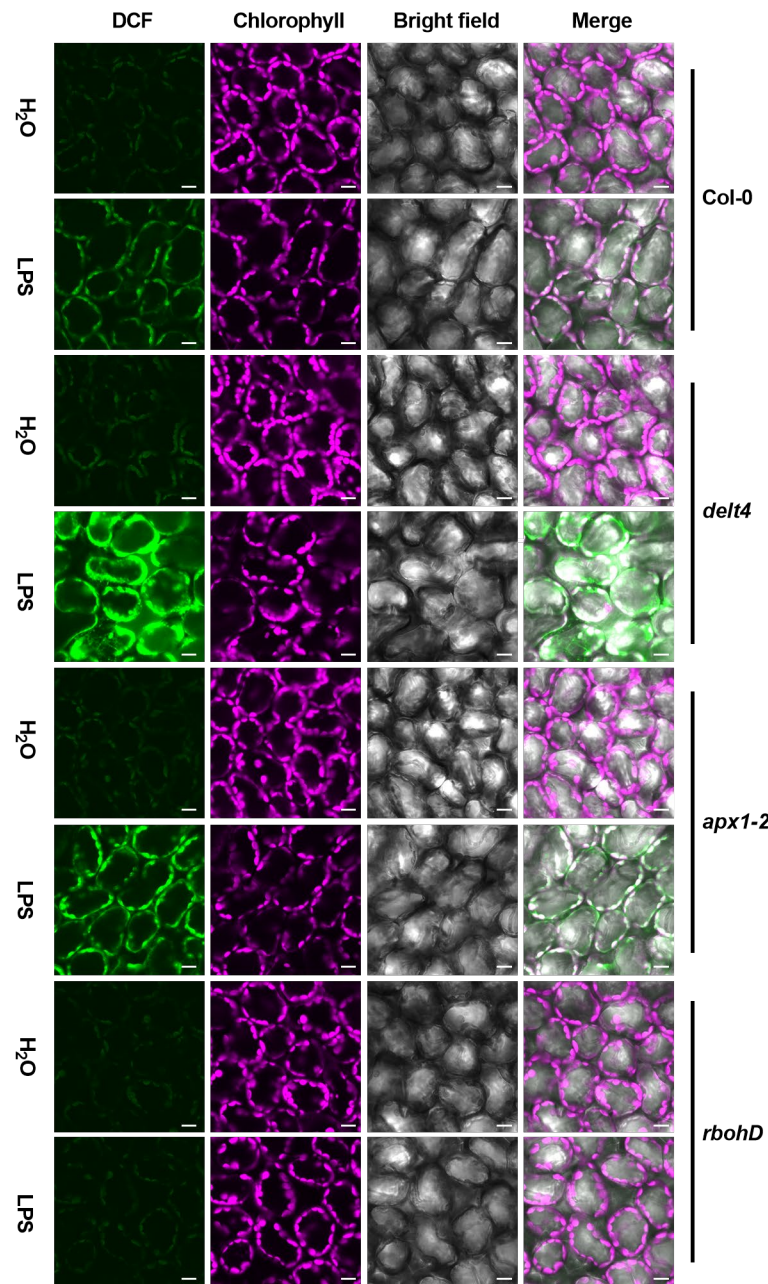

**Supplemental Figure S14. *apx1* mutants show increased cytosolic ROS accumulation after LPS treatment, as detected by H<sub>2</sub>DCFDA staining**

The seventh to ninth leaves of four-week-old Col-0, *delt4*, *apx1-2*, and *rbohD* plants were infiltrated with 100 µg/mL LPS, with ddH<sub>2</sub>O as the control. ROS was detected at 4 h post infiltration. Before detection under confocal microscopy, the collected leaves were immersed in 10 µM H<sub>2</sub>DCFDA solution for at least 30 min and then washed with ddH<sub>2</sub>O several times. Green colors indicate ROS fluorescence, and magenta colors indicate chlorophyll autofluorescence. At least six leaves were observed for each treatment, and representative images were shown. Scale bars, 10 µm. The experiment was repeated three times with similar results.

**Supplemental Table S1. Primers used in this study**

| Primer          | Sequences (5' to 3')    | Experiments     |
|-----------------|-------------------------|-----------------|
| Salk_000249-LP  | CCACCCTGGAAGAGAGGTTAG   | Genotyping      |
| Salk_000249-RP  | CAACGGATGTGTTCAAATCG    | Genotyping      |
| Salk_091880-LP  | GCTTTCATTTGTTTACCATC    | Genotyping      |
| Salk_091880-RP  | GAATTGGACATGAGCTGAATTAG | Genotyping      |
| Salk_057686-LP  | TGGTCCTCCAGTGATCTCAAC   | Genotyping      |
| Salk_057686-RP  | CACGTGGTGTGTATCTGTTGG   | Genotyping      |
| Salk_057998-LP  | AGAGGCAAGATATCCTCAGGC   | Genotyping      |
| Salk_057998-RP  | TCTGGTGCTCCTGTATGGAAC   | Genotyping      |
| Salk_092911-LP  | TAACCGGAGTTTGAACACCAG   | Genotyping      |
| Salk_092911-RP  | TCGATTGTTTAGACGTCCGAC   | Genotyping      |
| AvrRpt2-F       | ATGAAAATTGCTCCAGTTGCC   | Genotyping      |
| AvrRpt2-R       | GCGGTAGAGCATTGCGTGTGG   | Genotyping      |
| <i>rps2</i> -F  | AGGTTTAGGCGTCGGGAACAGA  | Genotyping      |
| <i>rps2</i> -R  | GCTAGTGGCAATCCTCCACA    | Genotyping      |
| <i>delt4</i> -F | CACACTCTGGTTCGTTTCTCTC  | Genotyping      |
| <i>delt4</i> -R | GATGTGTTCAAATCGCAACC    | Genotyping      |
| T1G11-F         | AATTGCATAAGGCACTTGAAAG  | Genetic mapping |
| T1G11-R         | GAAGACAAAGCTCTGCAGTAATG | Genetic mapping |
| SRP54A-F        | AAAAGGAACCCTACCAAAAACA  | Genetic mapping |

---

|             |                                                            |                 |
|-------------|------------------------------------------------------------|-----------------|
| SRP54A-R    | TGAATTATGGAATCAATGTTCG                                     | Genetic mapping |
| SGCSNP170-F | CACCAAGAGGAGAAGAGGAGGA                                     | Genetic mapping |
| SGCSNP170-R | AAACCAACAACCAAGCCTTG                                       | Genetic mapping |
| PHYA-F      | CGTCATGCAAACCTATCAGTGCTC                                   | Genetic mapping |
| PHYA-R      | GATTACTCAACCTCAGTGCG                                       | Genetic mapping |
| F10K1-F     | ATCATAGCAAAGTTGCTGGTCA                                     | Genetic mapping |
| F10K1-R     | TCTCTACGGCTCTTTCCTT                                        | Genetic mapping |
| F22O13-F    | GTCTTGATTCTATTGGTCATTGTGC                                  | Genetic mapping |
| F22O13-R    | CGTCTAATGCTTCGATAGCCTGT                                    | Genetic mapping |
| NGA111-F    | TGTTTTTTAGGACAAATGGCG                                      | Genetic mapping |
| NGA111-R    | CTCCAGTTGGAAGCTAAAGGG                                      | Genetic mapping |
| NGA280-F    | CTGATCTCACGGACAATAGTGC                                     | Genetic mapping |
| NGA280-R    | GGCTCCATAAAAAGTGCACC                                       | Genetic mapping |
| CIW1-F      | ACATTTTCTCAATCCTTACTC                                      | Genetic mapping |
| CIW1-R      | GAGAGCTTCTTTATTTGTGAT                                      | Genetic mapping |
| CIW12-F     | AGGTTTTATTGCTTTTCACA                                       | Genetic mapping |
| CIW12-R     | CTTCAAAAAGCACATCACA                                        | Genetic mapping |
| F21M12-F    | GGCTTTCTCGAAATCTGTCC                                       | Genetic mapping |
| F21M12-R    | TTACTTTTTGCCTCTTGTCATTG                                    | Genetic mapping |
| APX1-GW-F   | GGGGACAAGTTTGTACAAAAAAGCAGGCTAC<br>CACGACTTCCGTCGAGTAGATTC | Gene cloning    |

|                          |                                                            |              |
|--------------------------|------------------------------------------------------------|--------------|
| APX1-GW-R                | GGGGACCACTTTGTACAAGAAAGCTGGGTCA<br>GCATCAGCAAACCTGCAACCAAC | Gene cloning |
| APX1-CDS-<br>GW-F        | GGGGACAAGTTTGTACAAAAAAGCAGGCTAC<br>ATGACGAAGAACTACCCAAC    | Gene cloning |
| APX1-CDS-<br>GW-R        | GGGGACCACTTTGTACAAGAAAGCTGGGTCA<br>GCATCAGCAAACCCAAGCT     | Gene cloning |
| gAt1g07700-<br>GW-F      | GGGGACAAGTTTGTACAAAAAAGCAGGCTAC<br>GGCTGACAAAGTCGATACCA    | Gene cloning |
| gAt1g07700-<br>GW-R      | GGGGACCACTTTGTACAAGAAAGCTGGGTCTA<br>ACCAAAACTAGTAAGCTG     | Gene cloning |
| APX1 <sup>C32S</sup> -F  | ATCGCTGAGAAGAAGAACTCTGCACCCATC<br>ATGGTC                   | Gene cloning |
| APX1 <sup>C32S</sup> -R  | GACCATGATGGGTGCAGAGTTCTTCTC<br>AGCGAT                      | Gene cloning |
| cAPX1 <sup>W41F</sup> -F | TCCGACTCGCATTCCACTCTGCT                                    | Gene cloning |
| cAPX1 <sup>W41F</sup> -R | AGCAGAGTGAATGCGAGTCGGA                                     | Gene cloning |
| cAPX1 <sup>R38H</sup> -F | ATCATGGTCCATCTCGCATGGCA                                    | Gene cloning |
| cAPX1 <sup>R38H</sup> -R | TGCCATGCGAGATGGACCATGAT                                    | Gene cloning |
| gAPX1 <sup>W41F</sup> -F | TGGCTAAACTGCAGATTCCACTCTGCTGGAAC                           | Gene cloning |
| gAPX1 <sup>W41F</sup> -R | GTTCCAGCAGAGTGAATCTGCAGTTTAGCCA                            | Gene cloning |
| gAPX1 <sup>R38H</sup> -F | ATCATGGTCCATCTCGCGTAAG                                     | Gene cloning |
| gAPX1 <sup>R38H</sup> -R | CTTACGCGAGATGGACCATGAT                                     | Gene cloning |
| Actin7-F                 | ATGGCCGATGGTGAGGATAT                                       | RT-PCR       |
| Actin7-R                 | TCTGCGGTAGTGGTGAACAT                                       | RT-PCR       |

---

---

|                  |                            |         |
|------------------|----------------------------|---------|
| EF-1 $\alpha$ -F | TGAGCACGCTCTTCTTGCTTTCA    | RT-qPCR |
| EF-1 $\alpha$ -R | GGTGGTGGCATCCATCTTGTTACA   | RT-qPCR |
| APX1-F           | GTCCATTCGGAACAATGAGGTTTGAC | RT-qPCR |
| APX1-R           | GTGGGCACCAGATAAAGCGACAAT   | RT-qPCR |
| GPX1-F           | GTCTCCGGTAACCAAAAATG       | RT-qPCR |
| GPX1-R           | GACGAGAAAGGTTGCTGAGG       | RT-qPCR |
| GPX2-F           | AAACTGCGTTGGGACAGG         | RT-qPCR |
| GPX2-R           | CCCATGAAAAGACATCGAATAC     | RT-qPCR |
| GPX3-F           | GGGTCAATCAGCGAGCTAC        | RT-qPCR |
| GPX3-R           | CGATGGCGAAGAAGGGTATC       | RT-qPCR |
| GPX7-F           | TCGGCCCATCATTGAGATTC       | RT-qPCR |
| GPX7-R           | CTGCAGCCCTTGCATAGAC        | RT-qPCR |
| APX2-F           | CTGGTGGACACACCTTGGG        | RT-qPCR |
| APX2-R           | GCAGCATATTTTTCAACAAATGGGA  | RT-qPCR |
| APX6-F           | CGGCCCAACAATTCCAGTAGT      | RT-qPCR |
| APX6-R           | GAGGTAGCTTGCCTTCTGGATC     | RT-qPCR |
| CAT1-F           | ATGACTCGATCGCAGCCG         | RT-qPCR |
| CAT1-R           | TCTTCATGGGCAGGATCCAT       | RT-qPCR |
| CAT2-F           | TGTCCGGTTCTCCACCGTTA       | RT-qPCR |
| CAT2-R           | AACCACGAGGGTCTCTCAAGGT     | RT-qPCR |
| CAT3-F           | CTACATGTCCCACCTTGCCTG      | RT-qPCR |

---

|        |                     |         |
|--------|---------------------|---------|
| CAT3-R | CTCGGGGTAGTTGCCAGAT | RT-qPCR |
|--------|---------------------|---------|

**Supplemental Table S2. Constructs used in this study**

| Construct name                   | Vectors     | Usage                  |
|----------------------------------|-------------|------------------------|
| pAPX1::APX1                      | PGWB1       | Transgenic plants      |
| pAPX1::APX1-GFP                  | PGWB4       | Transgenic plants      |
| pAPX1::APX1 <sup>W41F</sup>      | PGWB1       | Transgenic plants      |
| pAPX1::APX1 <sup>R38H</sup>      | PGWB1       | Transgenic plants      |
| pAPX1::APX1 <sup>C32S</sup> -GFP | PGWB4       | Transgenic plants      |
| 35S::At1g07700-HA                | PGWB14      | Transgenic plants      |
| MBP-APX1                         | pMAL-c2x-GW | Prokaryotic expression |
| MBP-APX1 <sup>W41F</sup>         | pMAL-c2x-GW | Prokaryotic expression |
| MBP-APX1 <sup>R38H</sup>         | pMAL-c2x-GW | Prokaryotic expression |
| MBP-APX1 <sup>C32S</sup>         | pMAL-c2x-GW | Prokaryotic expression |
